# Supplementary material for: MXene hybrid nanocomposites enable high performance memory devices and artificial synapse applications
Source: Royal Society of Chemistry journal article supplement (doi:10.1039/d3tc04561g), 2024-01-01
Supplement: d3tc04561g1.pdf [file d3tc04561g1.pdf]

## Supporting Information

### **MXene Hybrid Nanocomposites Enables Highly Performance Memory Devices and Artificial Synapse Applications**

Cui Wang,<sup>[a],[b]</sup> Nuoya Li,<sup>[b]</sup> Hang Zeng,<sup>[a]</sup> Li Chen,<sup>\*[a],[b]</sup> Di Wu,<sup>[a],[b]</sup> and Jianlong  
Xia<sup>\*[a],[b]</sup>

[a] State Key Laboratory of Advanced Technology for Materials Synthesis and Processing, Center of Smart Materials and Devices, Wuhan University of Technology, No. 122 Luoshi Road, Wuhan 430070, China.

[b] School of Chemistry, Chemical Engineering and Life Science, Wuhan University of Technology, No. 122 Luoshi Road, Wuhan, 430070, China.

E-mail: J. L. Xia. (jlxia@whut.edu.cn); L. Chen. (lichen0430@whut.edu.cn)

|                                                                                                         |     |
|---------------------------------------------------------------------------------------------------------|-----|
| <b>Figure S1.</b> Preparation and Tyndall effect of the MXene nanosheets.....                           | S3  |
| <b>Figure S2.</b> Synthetic route of 4-trifluoromethylstyrene. ....                                     | S4  |
| <b>Figure S3.</b> <sup>1</sup> H NMR spectroscopy of 4-trifluoromethylstyrene. ....                     | S5  |
| <b>Figure S4.</b> Synthetic route of PTF.....                                                           | S6  |
| <b>Figure S5.</b> SEM, AFM, Lateral size distribution and GPC of PTF nanoparticles.....                 | S7  |
| <b>Figure S6.</b> Crossing-SEM and EDXS images of MXP nanocomposite. ....                               | S8  |
| <b>Figure S7.</b> SEM image of MXene nanosheet, MXP nanocomposite.....                                  | S9  |
| <b>Figure S8.</b> HRTEM images of MXene nanosheet and MXP nanocomposite. ....                           | S10 |
| <b>Figure S9.</b> TGA curve and UV-Vis spectra of the MXene nanosheets, PTF and MXP nanocomposite. .... | S11 |
| <b>Figure S10.</b> Contact angles of MXene, PTF and MXP nanocomposite. ....                             | S12 |
| <b>Figure S11.</b> The performance of the memory with the MXene nanosheets as the floating gate.....    | S13 |
| <b>Figure S12.</b> The performance of the memory with the PTF as the floating gate. ...                 | S14 |
| <b>Figure S13.</b> Typical transfer and Output characteristics of the memory devices. ...               | S15 |
| <b>Figure S14.</b> The performance of the memory device in different program times. .                   | S16 |
| <b>Figure S15.</b> The performance of the memory device in different $V_G$ sweep. ....                  | S17 |
| <b>Figure S16.</b> EPSC responses of memory device with PTF and MXene as the floating gate. ....        | S18 |
| <b>Table S1.</b> Comparisons with other floating gate materials. ....                                   | S19 |

**The synthesis and characterization of  $Ti_3C_2Tx$  MXene**

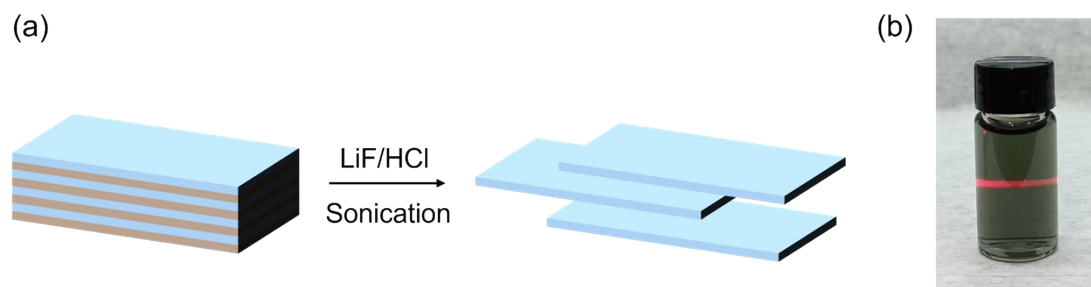

**Figure S1.** (a) Preparation of the MXene nanosheets, (b) Tyndall effect of the MXene nanosheets aqueous solution.

### Synthesis of monomer 4-trifluoromethyl styrene

To a mixture of methyltriphenylphosphonium bromide (PPh<sub>3</sub>MeBr, 10 mmol, 4.2 g) and THF (50 mL) was added into the two-necked flask, then add NaH (12 mmol, 280 mg) at room temperature and stir for 30 minutes under nitrogen atmosphere of 0 °C. Then, add p-trifluoromethylbenzaldehyde (10 mmol, 1.7 g) slowly at 0 °C and stir at room temperature for 8 h. The reaction is quenched with water and extracted with DCM. Dry the organic phase with anhydrous NaSO<sub>4</sub> and concentrated under reduced pressure to afford the crude product, which was separated and purified by silica gel column chromatography (PE). The final product was obtained (yield 60%). <sup>1</sup>H NMR (500 MHz, Chloroform-*d*): δ 7.58 (d, *J* = 8.0 Hz, 2H), 7.50 (d, *J* = 8.0 Hz, 2H), 6.75 (dd, *J* = 17.6, 10.9 Hz, 1H), 5.85 (d, *J* = 17.6 Hz, 1H), 5.39 (d, *J* = 10.9 Hz, 1H)

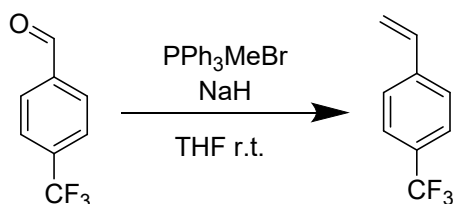

**Figure S2.** Synthetic route of 4-trifluoromethylstyrene.

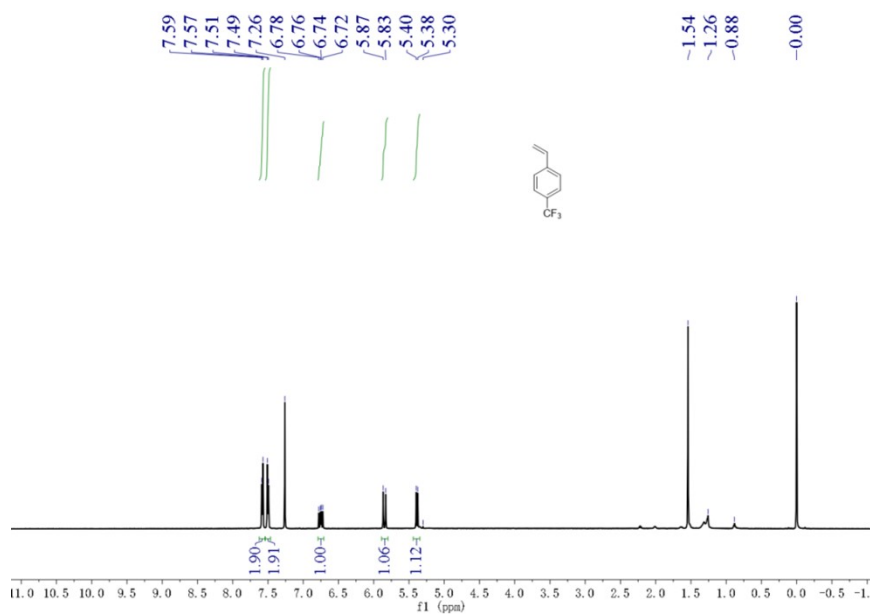

**Figure S3.**  $^1\text{H}$  NMR spectroscopy of 4-trifluoromethylstyrene.

### Synthesis of polymer 4-trifluoromethyl styrene (PTF)

To a mixture of monomer 4-trifluoromethyl styrene (2.46 mmol, 424 mg) and initiator azodiisobutyronitrile (AIBN, 0.1wt%) was added into a glass ampoule bottle. The mixture was stirred at 65 °C for 1 h and then heated at 80 °C for 24 hours under vacuum seal the ampoule bottle after three times of low-temperature freezing and air extraction cycles. The crude product is dissolved in chloroform and precipitated in methanol. The filtered final product was dried in a vacuum oven at 80 °C for 1 day, and the yield was 86%. <sup>1</sup>H NMR (500 MHz, Acetone-*d*<sub>6</sub>): δ 7.05 (4H), 1.68 (3H). GPC data:  $M_n = 1.16 \times 10^6$ , PDI = 2.64.

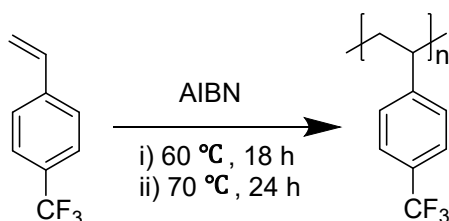

**Figure S4.** Synthetic route of PTF.

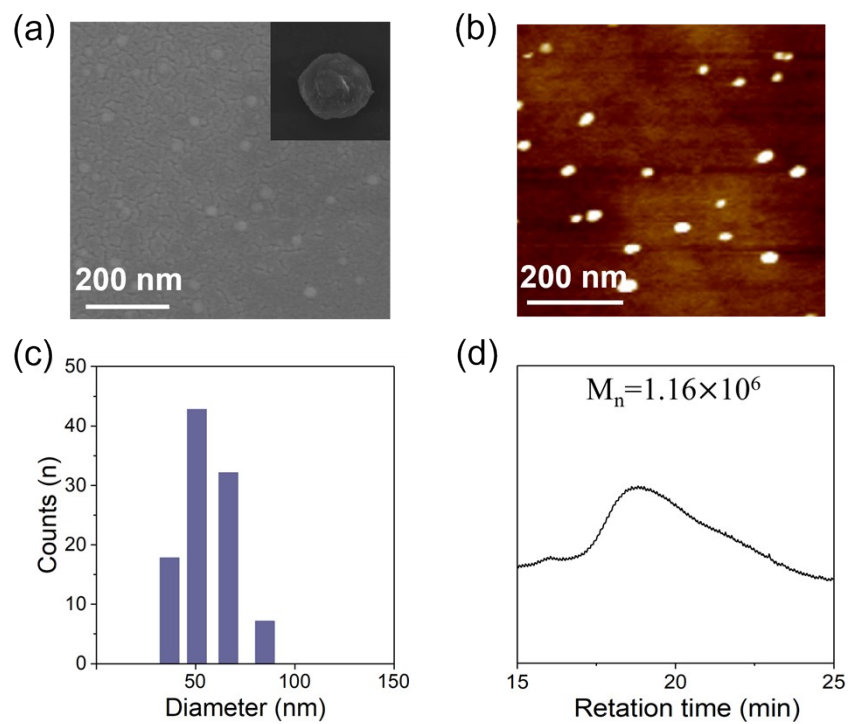

**Figure S5.** (a) SEM, (b) AFM, (c) Lateral size distribution and (d) GPC of PTF nanoparticles.

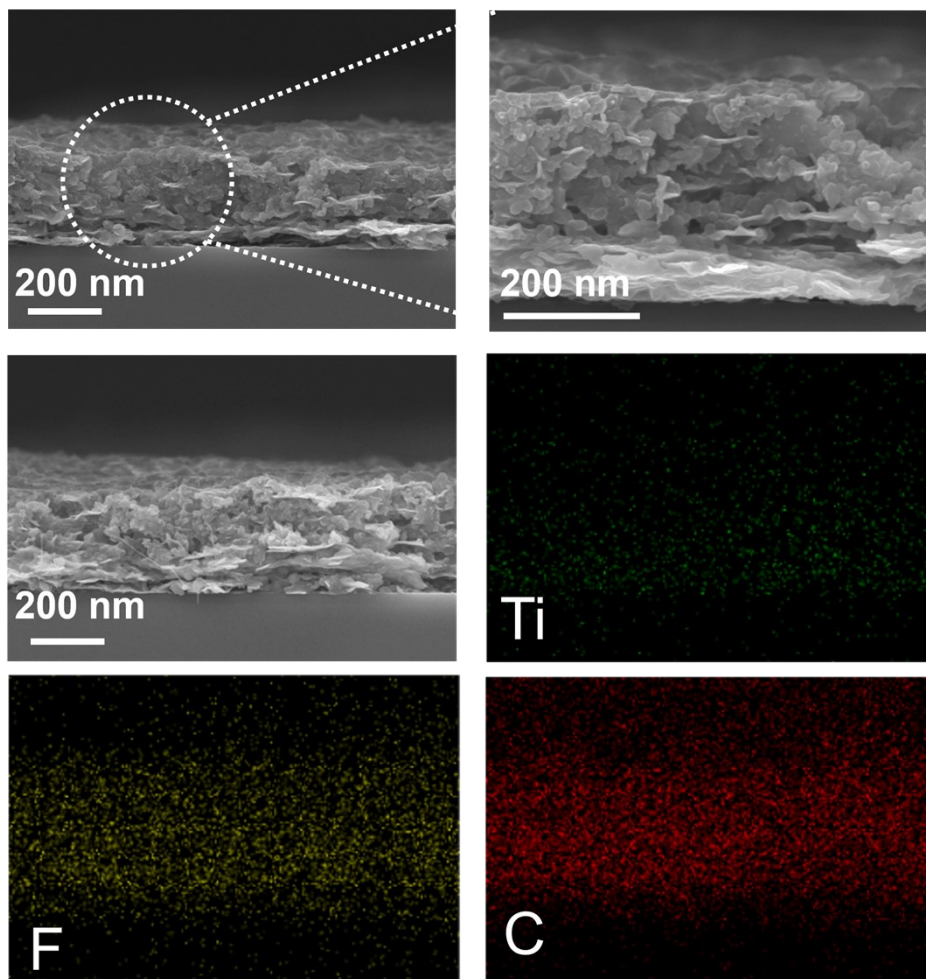

**Figure S6.** Crossing-SEM and EDXS images of MXP nanocomposite.



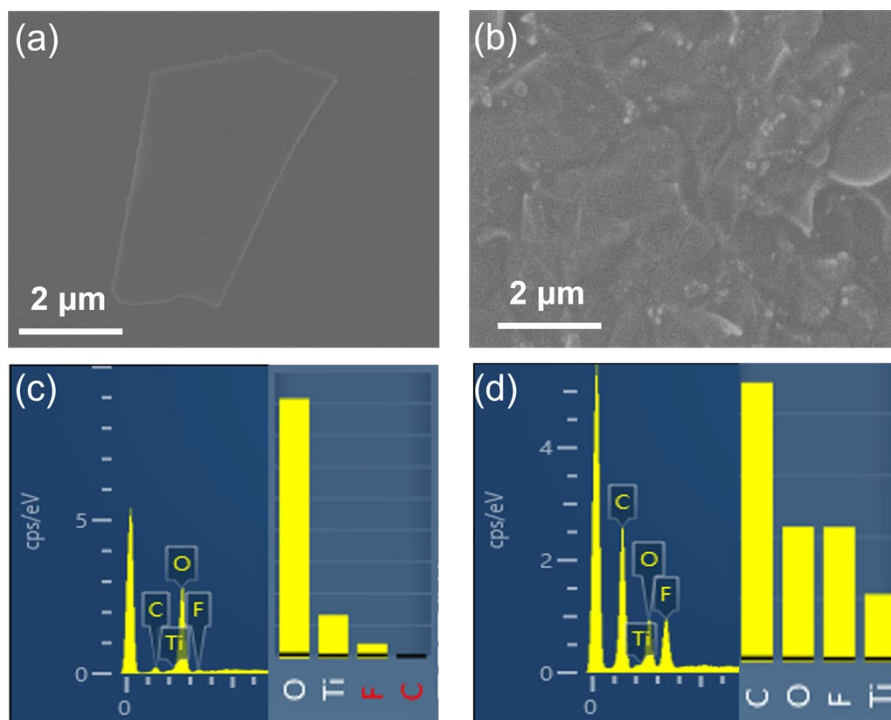

**Figure S7.** SEM image of a) MXene nanosheet, b) MXP nanocomposite, and mapping of element content distribution of c) MXene nanosheet, d) MXP nanocomposite.

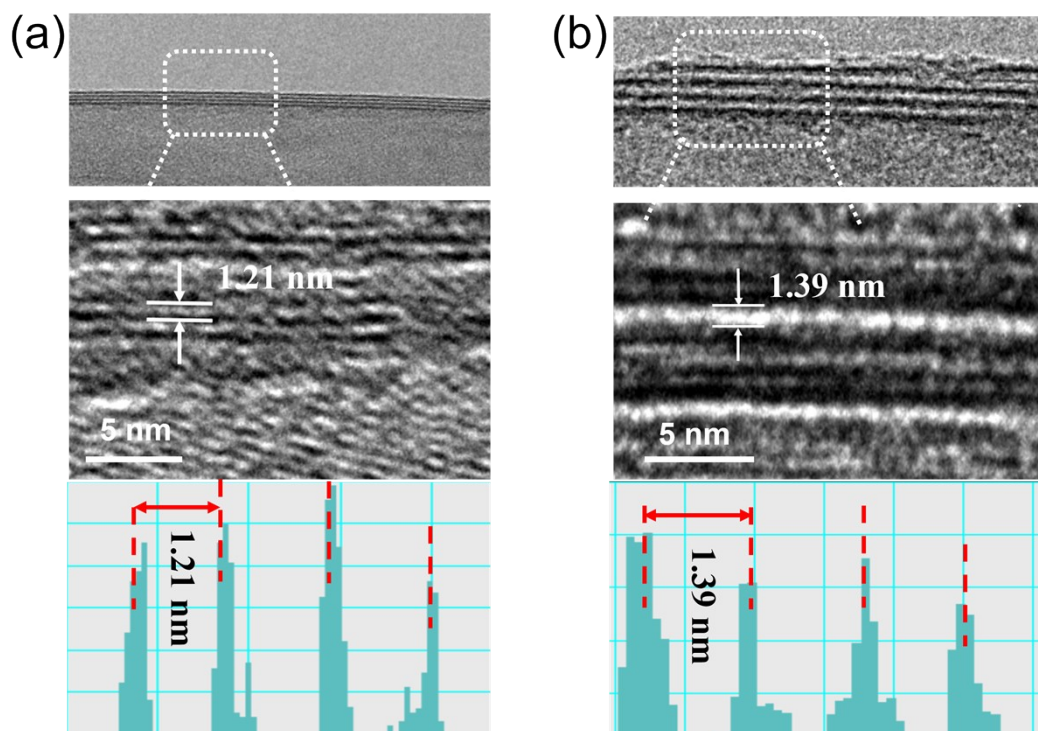

**Figure S8.** HRTEM images of a) MXene nanosheet, b) MXP nanocomposite, and the corresponding enlarged images.

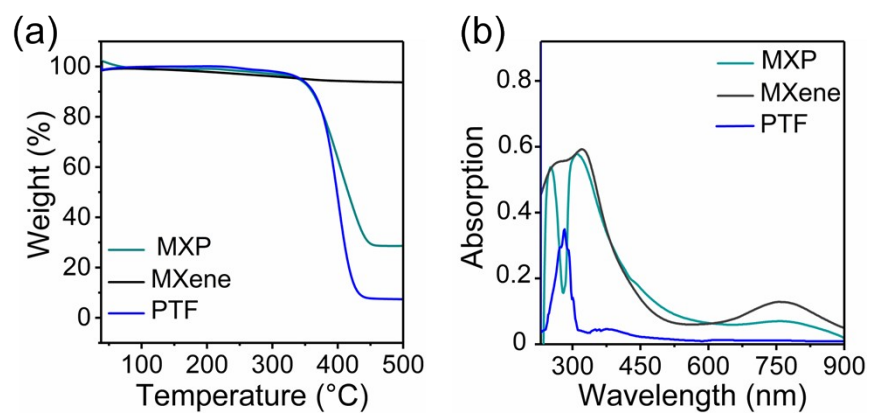

**Figure S9.** a) TGA curve and b) UV-Vis spectra of the PTF, MXene nanosheets and MXP nanocomposite.

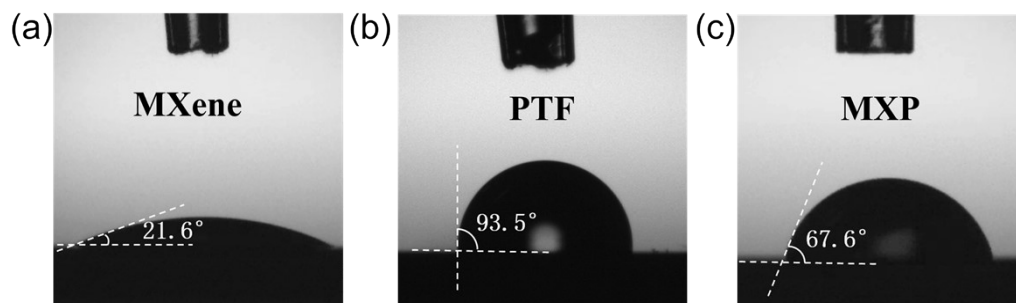

**Figure S10.** The contact angles of a) MXene nanosheets, b) PTFE and c) MXP nanocomposite.

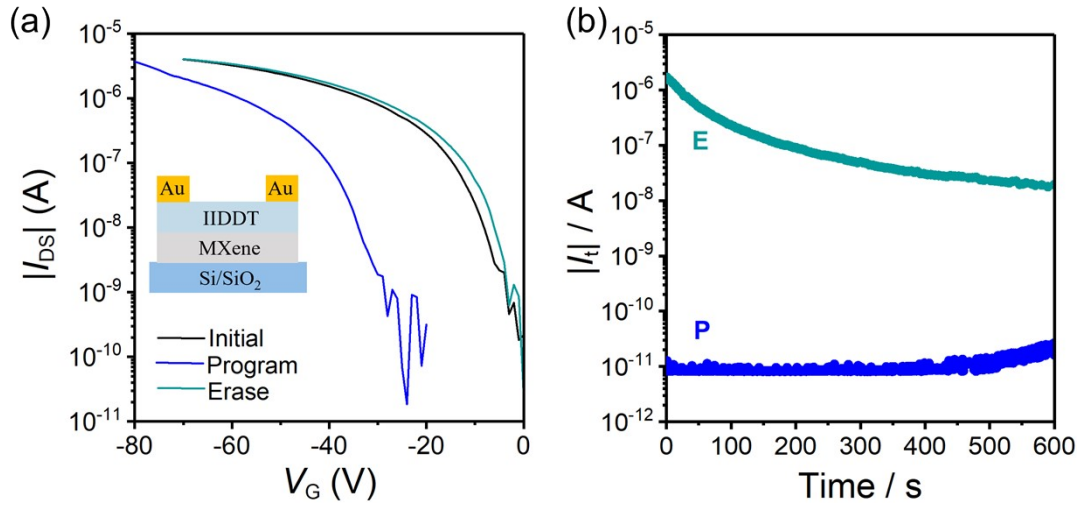

**Figure S11.** a) The programming and erasing characteristics of the memory with the MXene nanosheets as the floating gate under a negative programming gate voltage of  $-30$  V for 10 s, b) the retention characteristics of the memory device. (P and E represent “programmed” and “erased,” respectively).

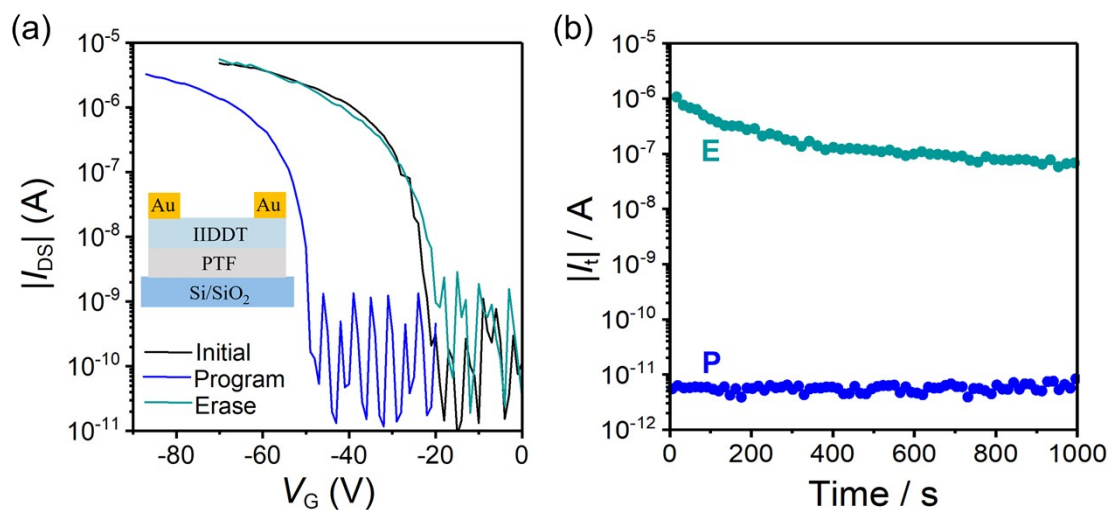

**Figure S12.** a) The programming and erasing characteristics of the memory with the PTF nanoparticles as the floating gate under a negative programming gate voltage of  $-30$  V for 10 s, b) the retention characteristics of the memory device. (P and E represent “programmed” and “erased,” respectively).

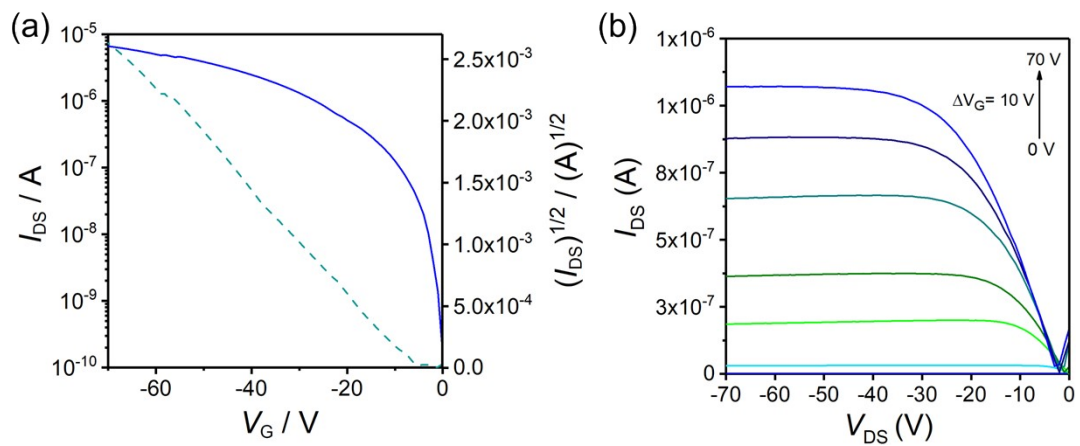

**Figure S13.** (a) Typical transfer and (b) Output characteristics of the memory devices.

( $V_G = -70 V$ ,  $V_{DS} = -70 V$ ).

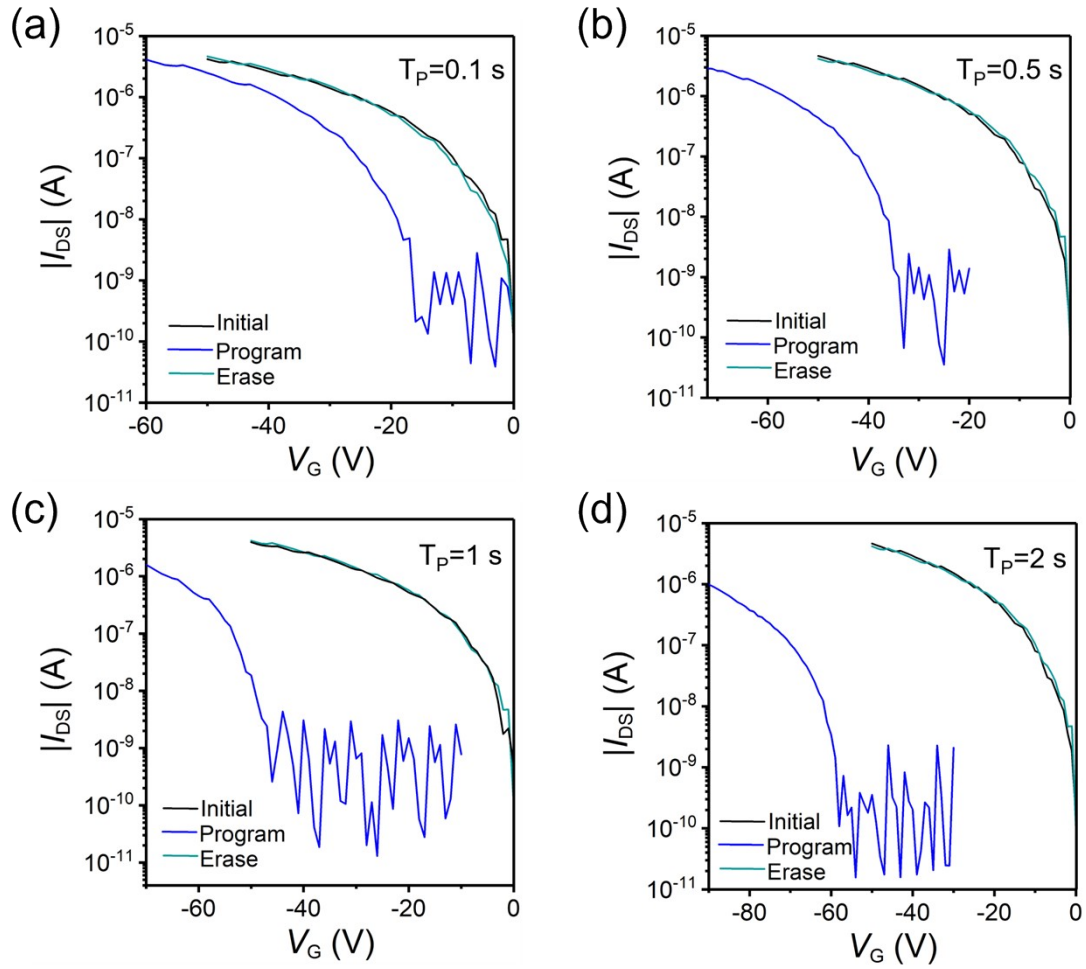

**Figure S14.** The typical transfer characteristics of the memory device in different program times in a)  $T_p = 0.1$  s, b)  $T_p = 0.5$  s, c)  $T_p = 1$  s, d)  $T_p = 2$  s.



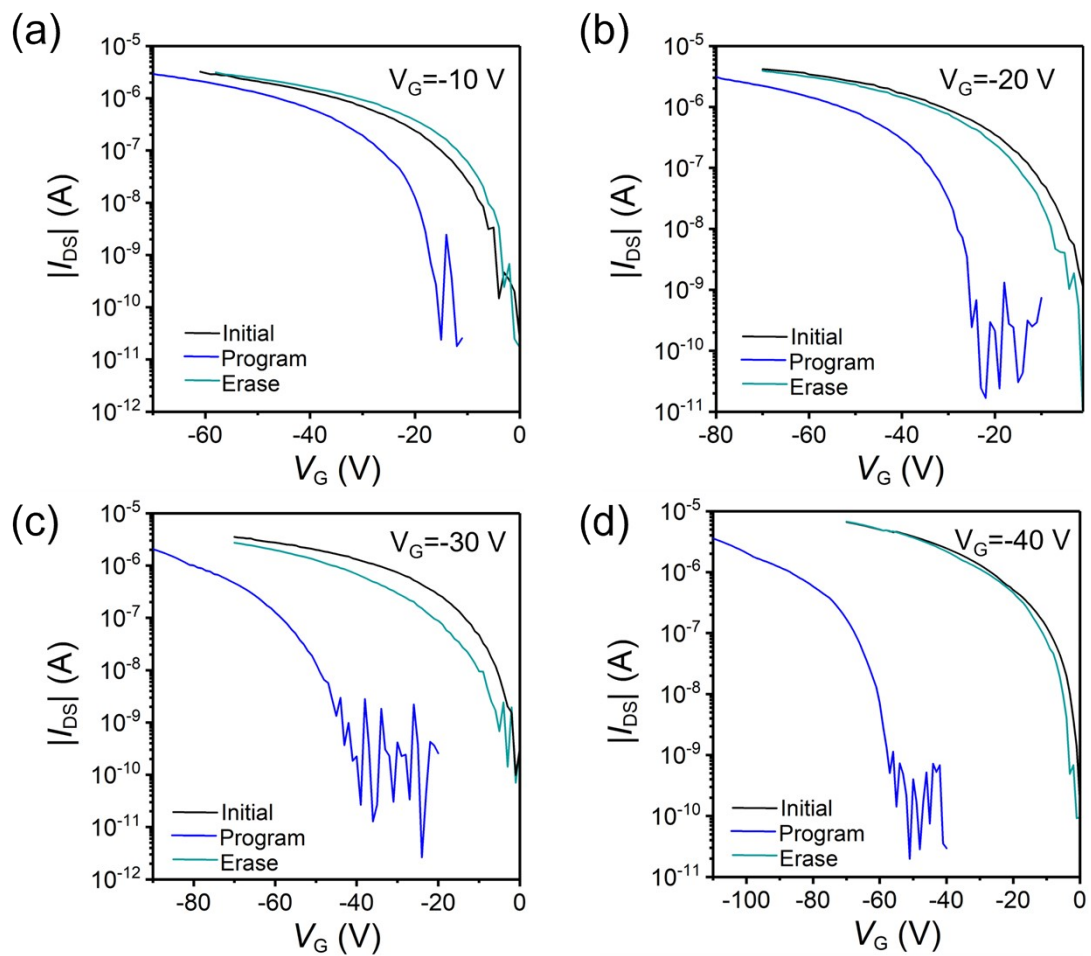

**Figure S15.** The typical transfer characteristics of the memory device in different  $V_G$  sweep at a)  $V_G = -10$  V, b)  $V_G = -20$  V, c)  $V_G = -30$  V, d)  $V_G = -40$  V.

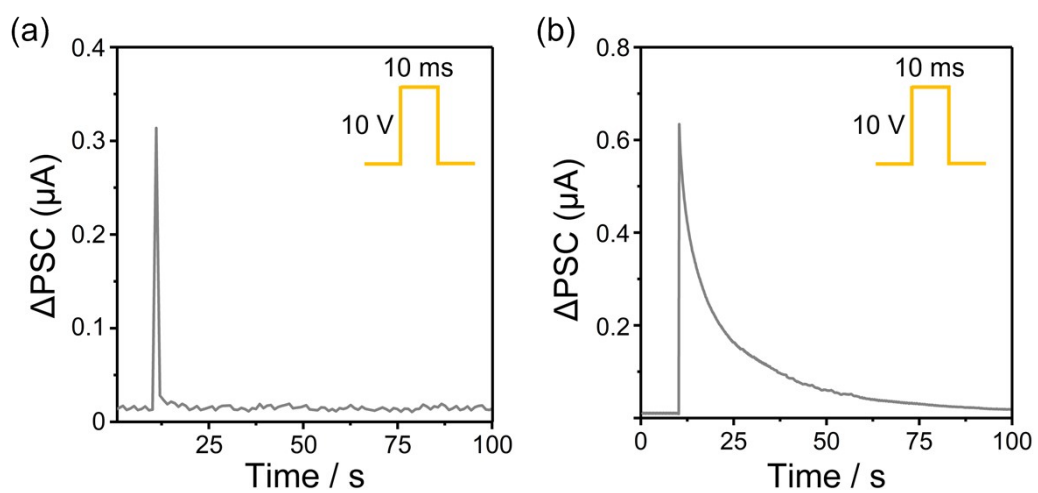

**Figure S16.** EPSC responses of memory device (a) with PTF nanoparticles as the floating gate (b) with the MXene nanosheets as the floating gate, to  $V_{WC}$  spike with magnitude of  $\pm 10$  V and duration ( $t_d$ ) of 10 ms.

**Table S1.** Comparisons with other floating gate materials.

| Floating gate                         | Device type | Program/Erase voltage (V)  | $\Delta V_T$ (V) | Retention time (s)       | Endurance cycle          | Synapse performance        |                                  | Ref.             |
|---------------------------------------|-------------|----------------------------|------------------|--------------------------|--------------------------|----------------------------|----------------------------------|------------------|
|                                       |             |                            |                  |                          |                          | $V_{WC}$ (V)               | Functions                        |                  |
| FPS                                   | FET         | $\pm 100$                  | 108              | $10^4$                   | --                       | --                         | --                               | S1               |
| PS+n-PyDI                             | FET         | $\pm 120$                  | 35               | $10^4$                   | 400                      | --                         | --                               | S2               |
| 4-CF <sub>3</sub> -PS                 | FET         | $\pm 70$                   | 35               | $3 \times 10^2$          | --                       | --                         | --                               | S3               |
| MXene                                 | FET         | $\pm 50$                   | 35.2             | $10^4$                   | $10^3$                   | $\pm 0.2$                  | EPSC, IPSC, PPF, LTD, LTP        | S4               |
| MXene/Ion-gel                         | FET         | $\pm 4$                    | 2                | $10^5$                   | 100                      | $\pm 10$                   | IPSC, PPD, LTD, LTP              | S5               |
| MOF                                   | FET         | $\pm 80$                   | 37.5             | $10^4$                   | 100                      | --                         | --                               | S6               |
| Ag@SiO <sub>2</sub>                   | FET         | $\pm 80$                   | 24               | $10^4$                   | 100                      | --                         | --                               | S7               |
| AuNPs@PS                              | FET         | $\pm 100$                  | 40               | $10^5$                   | 30                       | --                         | --                               | S8               |
| GO/pyridinium/GO                      | Memristor   | $\pm 5$                    | --               | $10^3$                   | $10^3$                   | $\pm 5$                    | PPF, STP, EPSC, PPI, STDP, SRDP  | S9               |
| Ti <sub>3</sub> C <sub>2</sub> Tx-PVP | Memristor   | $\pm 0.9$                  | --               | $8 \times 10^3$          | 40                       | --                         | --                               | S10              |
| PCBM-MoS <sub>2</sub>                 | Memristor   | $\pm 6$                    | --               | $10^4$                   | 100                      | --                         | --                               | S11              |
| <b>MXP</b>                            | <b>FET</b>  | <b><math>\pm 40</math></b> | <b>47.8</b>      | <b><math>10^5</math></b> | <b><math>10^4</math></b> | <b><math>\pm 10</math></b> | <b>EPSC, IPSC, PPF, LTD, LTP</b> | <b>This work</b> |

$\Delta V_T$  represent the memory window,  $V_{WC}$  represent the weight control voltage pulses.

## References

- S1. Y-W. Zhu, Y-K. Fan, S-T. Li, P. Wei, D-F. Li, B. Liu, D-M. Cui, Z-C. Zhang, G-C. Li, Y-J. Niece and G-H Lu, *Mater. Horiz.*, **2020**, *7*, 1861.
- S2. W-V. Wang, Y-M. Zhang, X-Y. Li, Z-Z. Chen, Z-H. Wu, L. Zhang, Z-W. Lin and H-L. Zhang, *InfoMat*, **2021**, *3*, 814–822.
- S3. E. Plunkett, T. S. Kale, Q. Zhang, H. E. Katz and D. H. Reich, *Appl. Phys. Lett.*, 2019, **114**, 023301.
- S4. B. Lyu, Y. Choi, H. Jing, C. Qian, H. Kang, S. Lee and J. H. Cho, *Adv. Mater.*, 2020, **32**, 1907633.
- S5. S. Kim, S-B. Jo, J. Kim, D. Rhee, Y-Y. Choi, D-H. Kim, J. Kang and J. H. Cho, *Adv. Funct. Mater.* **2022**, *32*, 2111956.
- S6. N. Shi, J. Zhang, Z. Ding, H. Jiang, Y. Yan, D. Gu, W. Li, M. Yi, F. Huang, S. Chen, L. Xie, Y. Ren, Y. Li and W. Huang, *Adv. Funct. Mater.*, 2022, **32**, 2110784.
- S7. X. Guo, W. Zhang, J. Yin, Y. Xu, Y. Bai and J. Yang, *Org. Electron.*, 2021, **93**, 106149.
- S8. K. Wang, H. Ling, Y. Bao, M. Yang, Y. Yang, M. Hussain, H. Wang, L. Zhang, L. Xie, M. Yi, W. Huang, X. Xie and J. Zhu, *Adv. Mater.*, 2018, **30**, 1800595.
- S9. Y. Li, S-T. Ling, R-Y. He, C. Zhang, Y. Dong, C-L. Ma, Y-C. Jiang, J. Gao, J-H. He and Q-C Zhang, *Nano Res.*, **2023**, *16*, 11278–11287.
- S10. C. Gu, H. W. Mao, W. Q. Tao, Z. Zhou, X. J. Wang, P. Tan, S. Cheng, W. Huang, L.-B. Sun, X.-Q. Liu and J.-Q. Liu, *ACS Appl. Mater. Interfaces*, 2019, **11**, 38061-38067.
- S11. W. Lv, H. Wang, L. Jia, X. Tang, C. Lin, L. Yuwen, L. Wang, W. Huang and R. Chen, *ACS Appl. Mater. Interfaces*, 2018, **10**, 6552-6559.
